# Supplementary material for: Hybrid Graph Learning Reconstructs Global Ocean Oxygen Spatiotemporal Changes
Source: Research Square preprint supplement (doi:10.21203/rs.3.rs-5587966/v1), 2025-01-14
Supplement: Supplementary file 1 [file 4fdb5cde45e5b6de48f6fcc7.pdf]

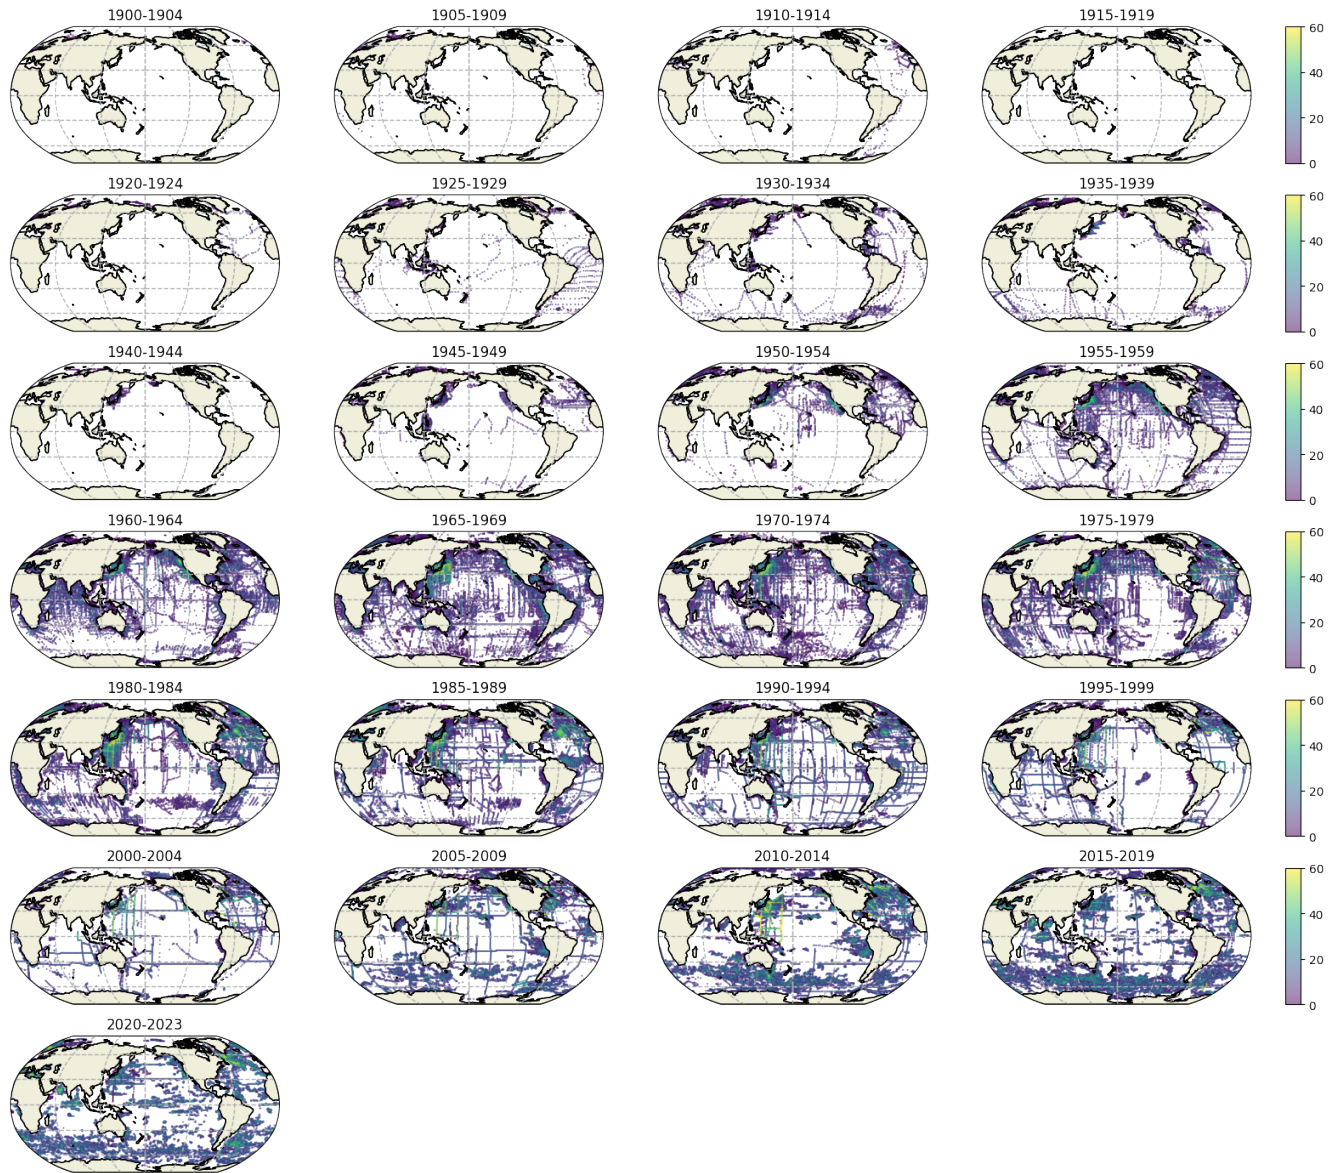

**Figure S1. Spatial distribution of dissolved oxygen gridded data every five years.** The color bar displays the proportion (%) of available observed data for each grid. The gridded data shows significant sparse and uneven distribution. There was a noticeable increase in data volume after 1955-1959. Therefore, our study primarily focuses on the period after 1960.

### (a) Knowledge Retrieval Module

#### ① Pre-training Transformer

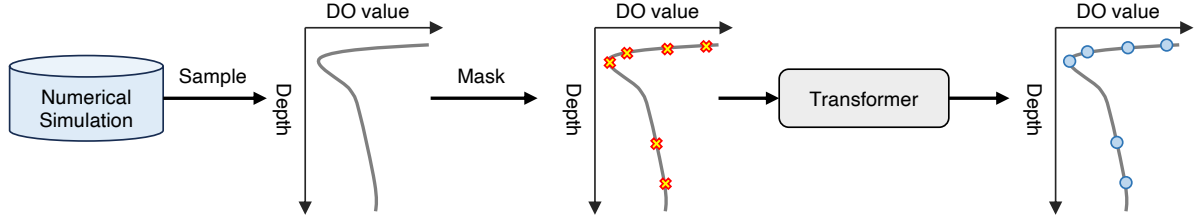

#### ② Pattern Matching for Each Node

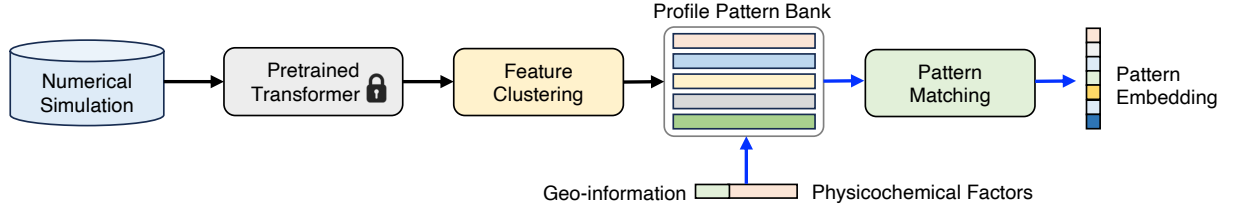

### (b) Knowledge Propagation Module

#### ① Propagation Message: Bi-directional Temporal Encoding

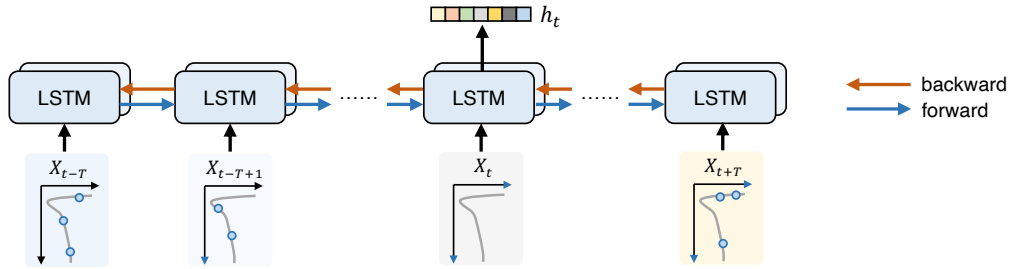

#### ② Propagation Parameter Generation: Zoning-varying Message Passing

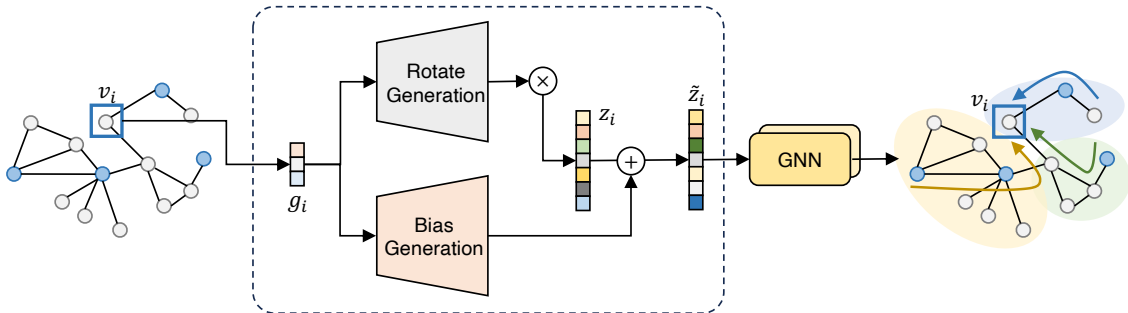

**Figure S2. Module design details of Jingwei.** **a**, Knowledge Retrieval Module. This module is further divided into two steps: first, pre-training the Transformer model using CMIP6 model data; second, obtaining a pattern bank and using node-level environmental variables as queries to retrieve pattern embeddings. **b**, Knowledge Propagation Module. First, bidirectional temporal encoding is performed using LSTM to derive temporal patterns at time  $t$  based on historical  $T$  steps and future  $T$  steps of temporal observation data. Second, an affine transformation (including rotation and bias) parameter is generated to the propagation information of the graph neural network, enabling zoning-varying message passing.

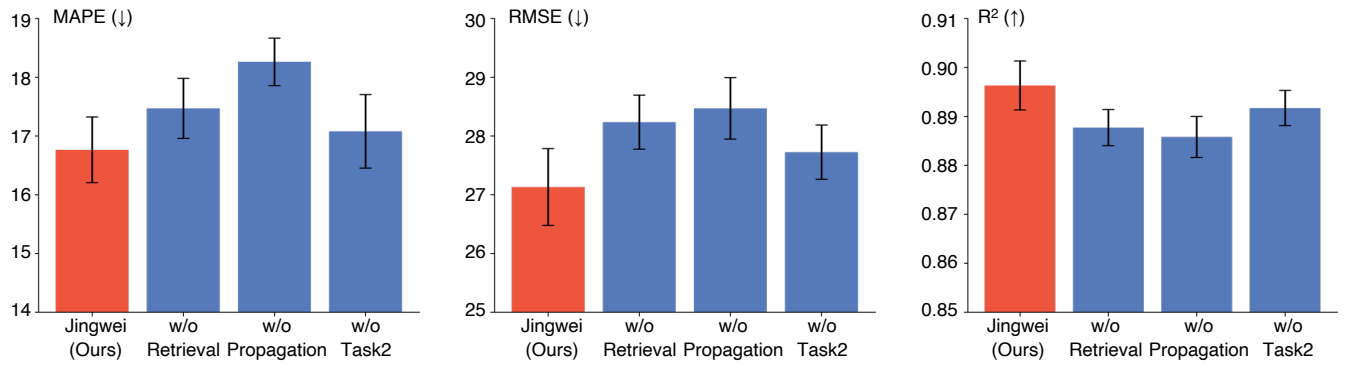

**Figure S3. Ablation study of Jingwei.** In the context of Jingwei framework, we analyze the impact of removing Knowledge Retrieval Module, Knowledge Propagation Module, and Task 2 Supervision (Self-supervised geo-coordinate regression) measured by MAPE, RMSE, and  $R^2$ . Our findings indicate that the removal of any individual module significantly affects model performance. Overall, Knowledge Propagation has the most substantial impact, followed by Knowledge Retrieval.

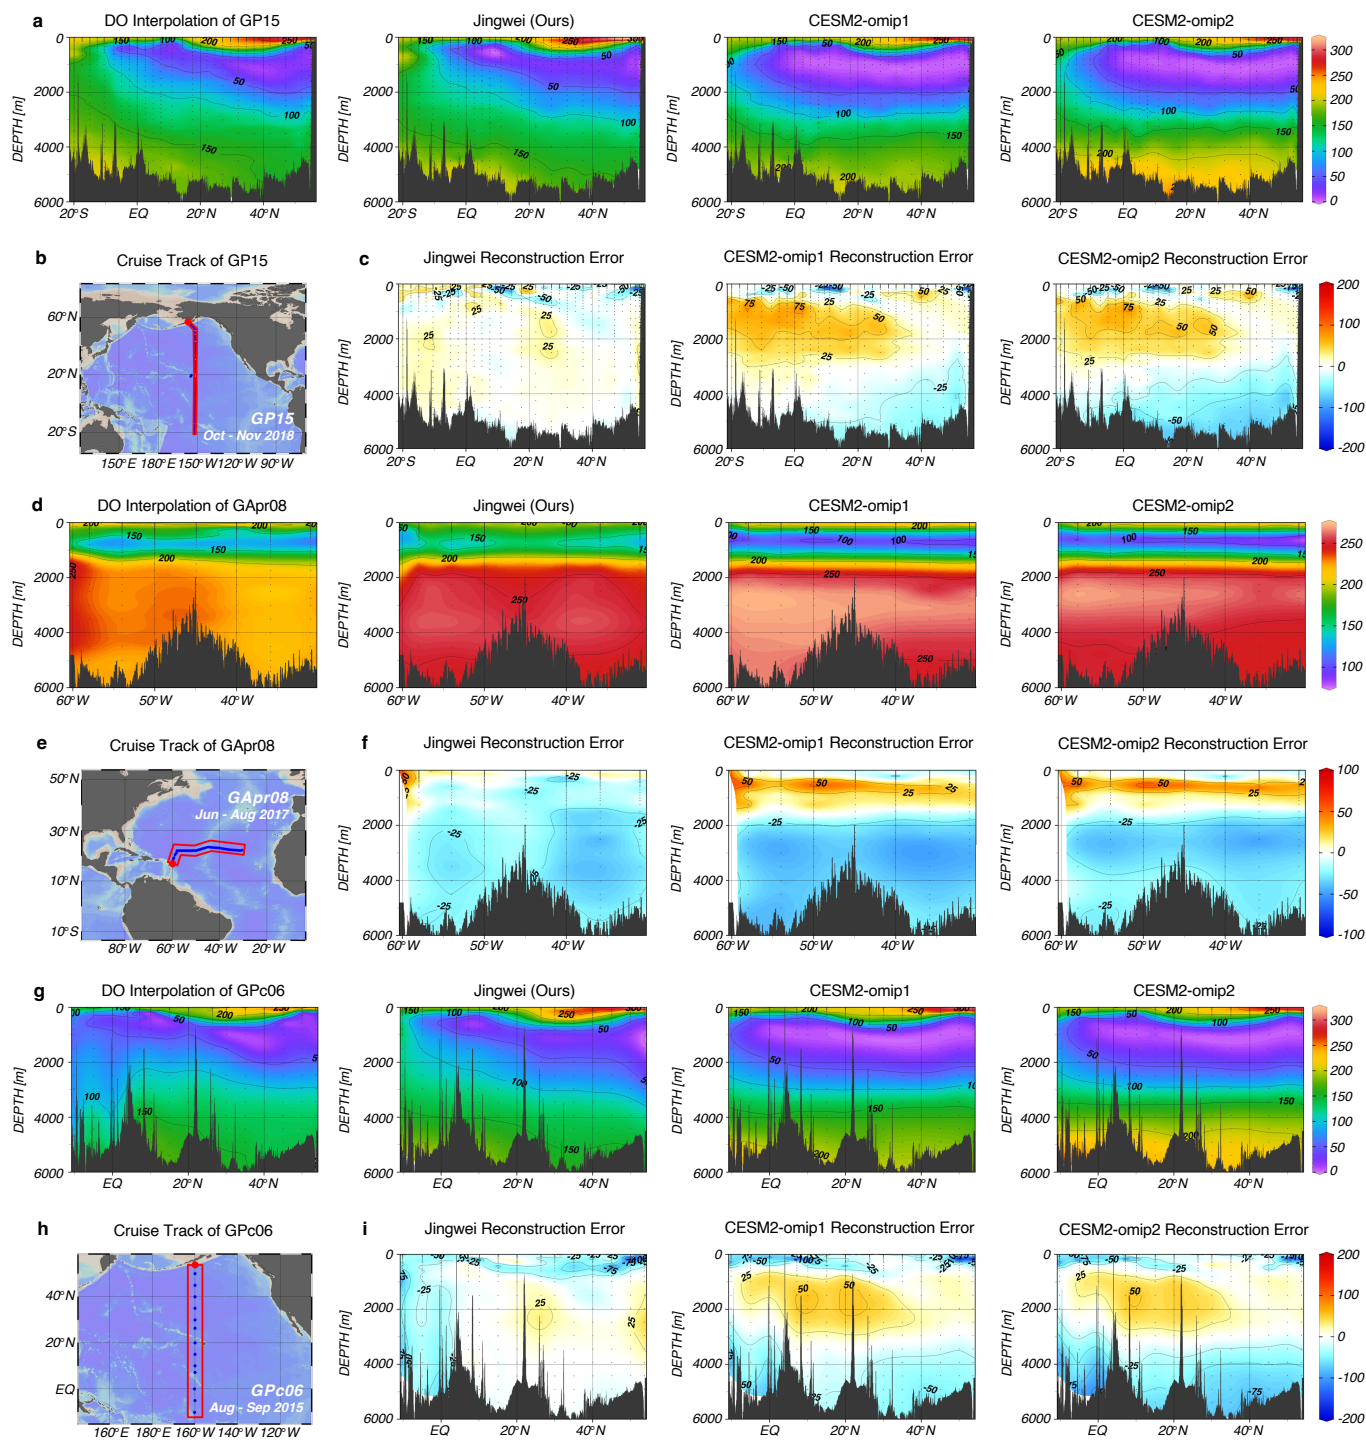

**Figure S4. Dense observations and reconstruction comparison of dissolved oxygen in cruise GP15, GApr08, GPc06. b, e, h, Geographical location information for three cruises. a, d, g, The interpolation results of dissolved oxygen obtained from dense observations (considered as ground truth), and results from Jingwei, CESM2-omip1, and CESM2-omip2. The simulations from GFDL-ESM4 are excluded from the comparison, as they only extend until 2014. c, f, i, The errors between different methods and the ground truth, revealing that Jingwei achieves the optimal reconstruction performance.**



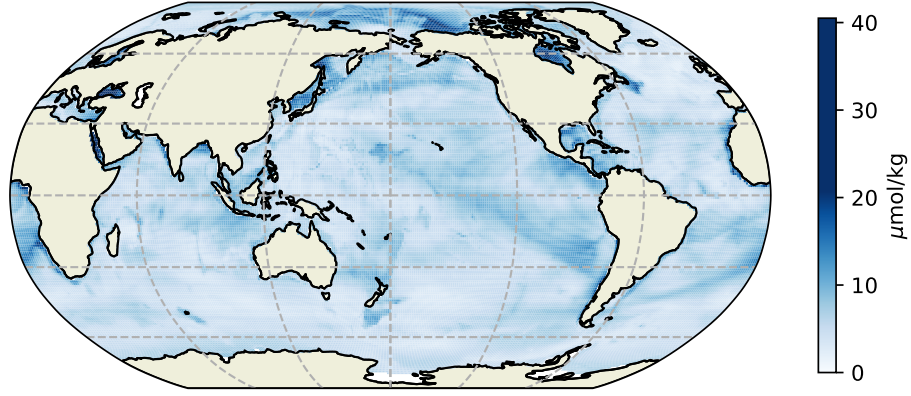

**Figure S5. The uncertainty of Jingwei model reconstruction.** The global overall uncertainty of Jingwei is  $6.410 \mu\text{mol/kg}$ . In the Arctic region, due to the relatively low number of observations, a higher uncertainty is observed. Additionally, in the coastal areas, the influence of human activities makes accurate predictions more challenging, resulting in Jingwei also indicating larger uncertainty than in other regions.

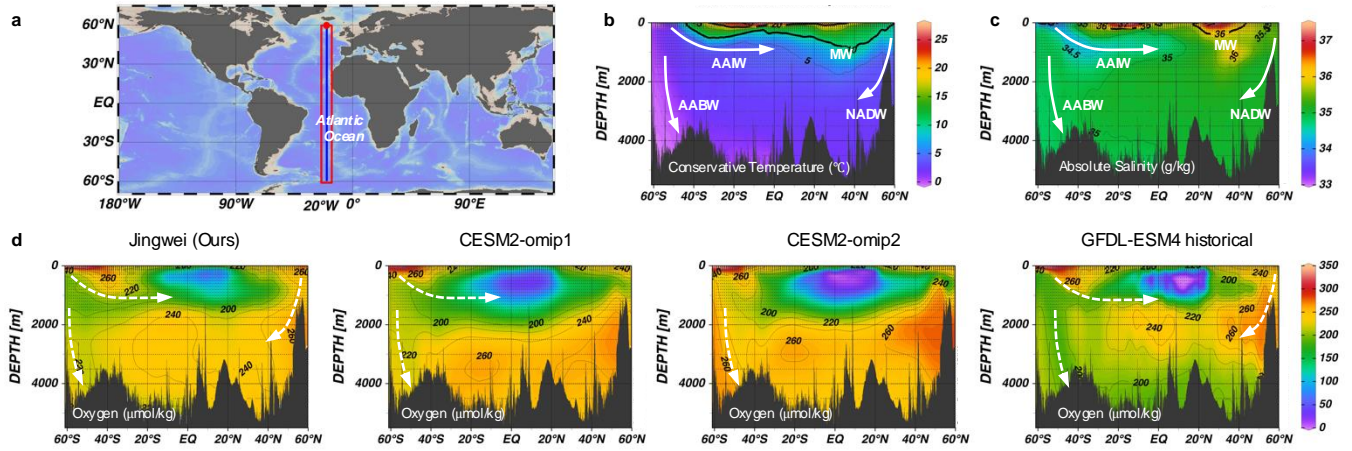

**Figure S6. Reconstruction performance of Atlantic Meridional Overturning Circulation (AMOC).** AMOC is a circulation system that integrates surface and deep currents in the Atlantic, with a generally stable overall pattern. The variation in dissolved oxygen concentration is influenced by the movement of AMOC water masses. **a**, We select the  $20^\circ\text{W}$  to observe the changes in dissolved oxygen concentration along this section. **b**, **c**, The distribution of conservative temperature and absolute salinity based on temperature and salinity observations, showing the variations of several AMOC water masses (AAIW, MW, AABW, and NADW). **d**, Comparison of the temporal average dissolved oxygen concentration distributions between Jingwei and three simulation results, i.e., CESM2-OMIP1, CESM2-OMIP2, and GFDL-ESM4, which reveals that Jingwei's reconstruction results effectively reflect the impact of various AMOC water masses on dissolved oxygen. This confirms that our data-driven reconstruction aligns with oceanographic principles and further demonstrates the effectiveness of our proposed method.

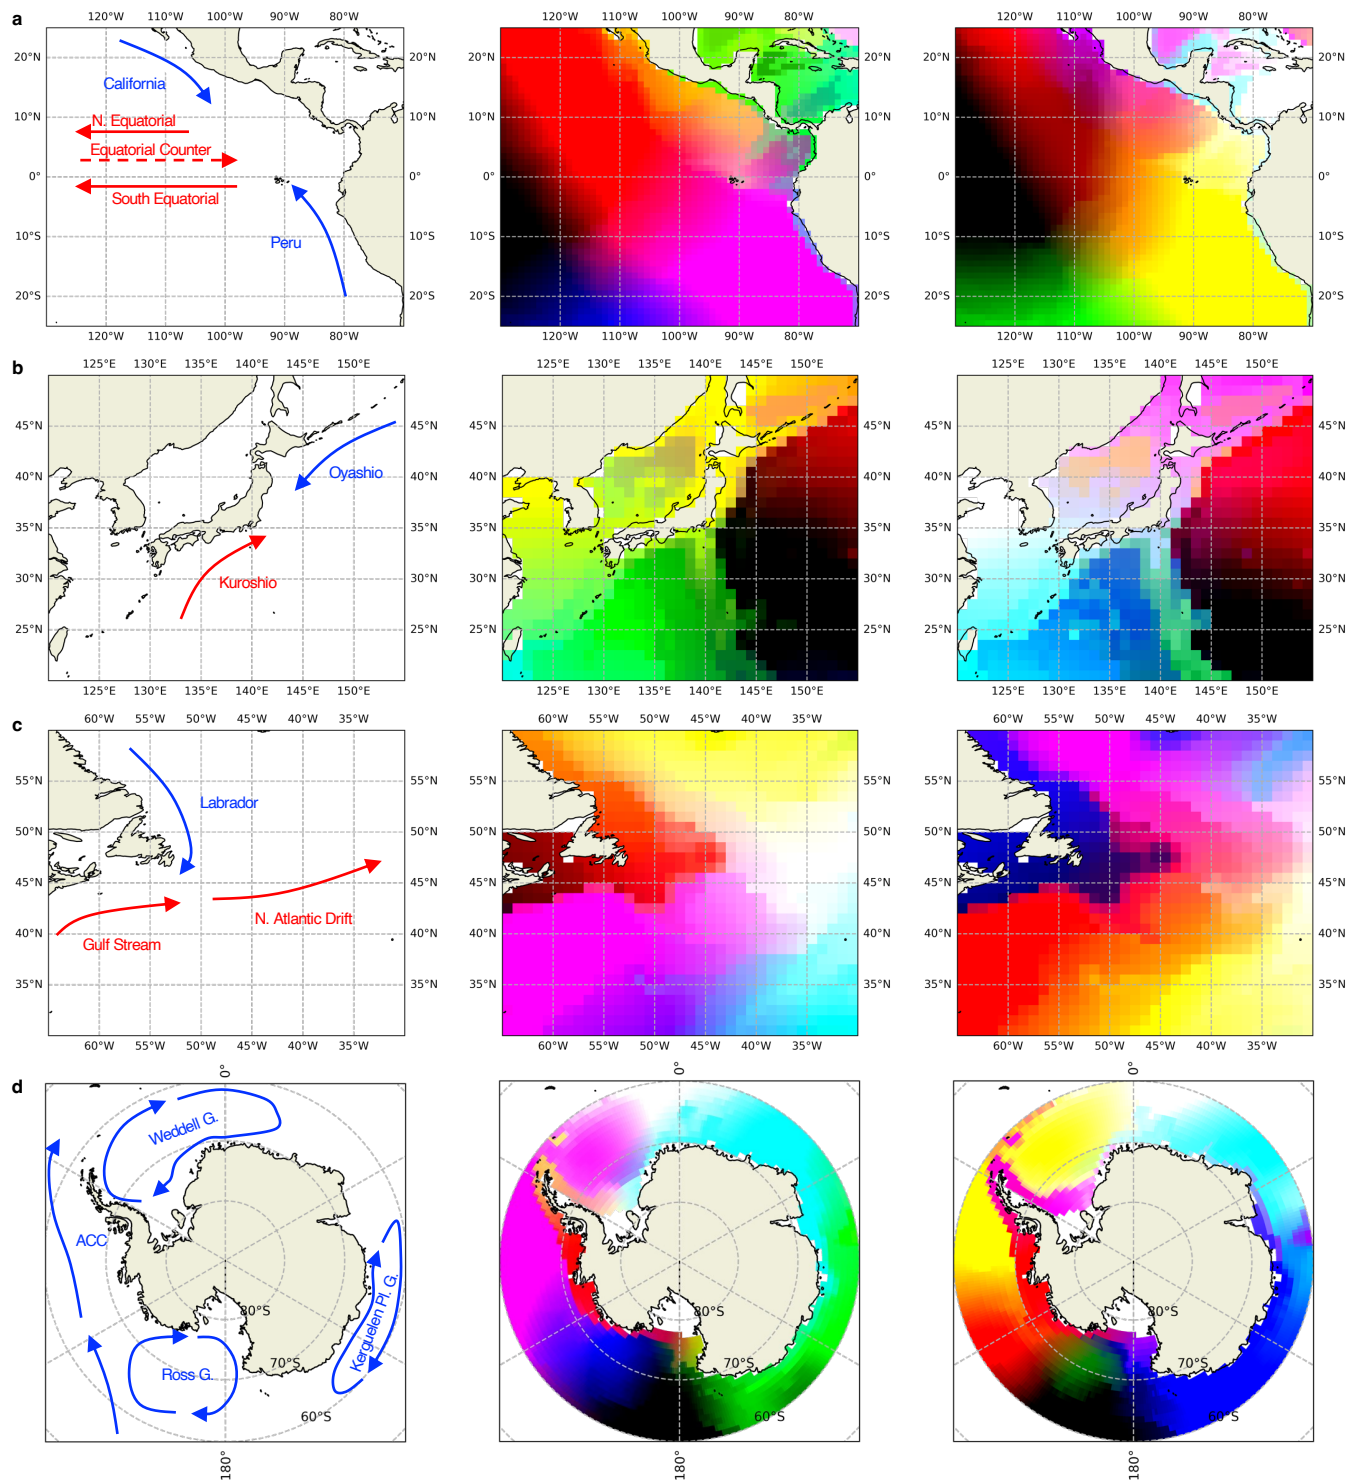

**Figure S7. More cases on Jingwei's spatial heterogeneity perception ability.** **a**, Eastern Equatorial Pacific: The regions traversed by the California Current and the Peru Current exhibit differences, with spatial features gradually changing as the offshore distance increases. **b**, Northwest Pacific, east of Japan: The regions traversed by the Oyashio Current and the Kuroshio Current exhibit differences, with the partition boundaries extending southeastward. **c**, Northwest Atlantic, east of Canada: The regions traversed by the Labrador Current and the Gulf Stream exhibit differences, with the junction evolving different features of the North Atlantic Drift further east. **d**, Southern Ocean: The presence of gyres in the Ross Sea, Weddell Sea, and Kerguelen Plateau, along with other factors, results in uniform internal features that distinguish these regions from surrounding waters.

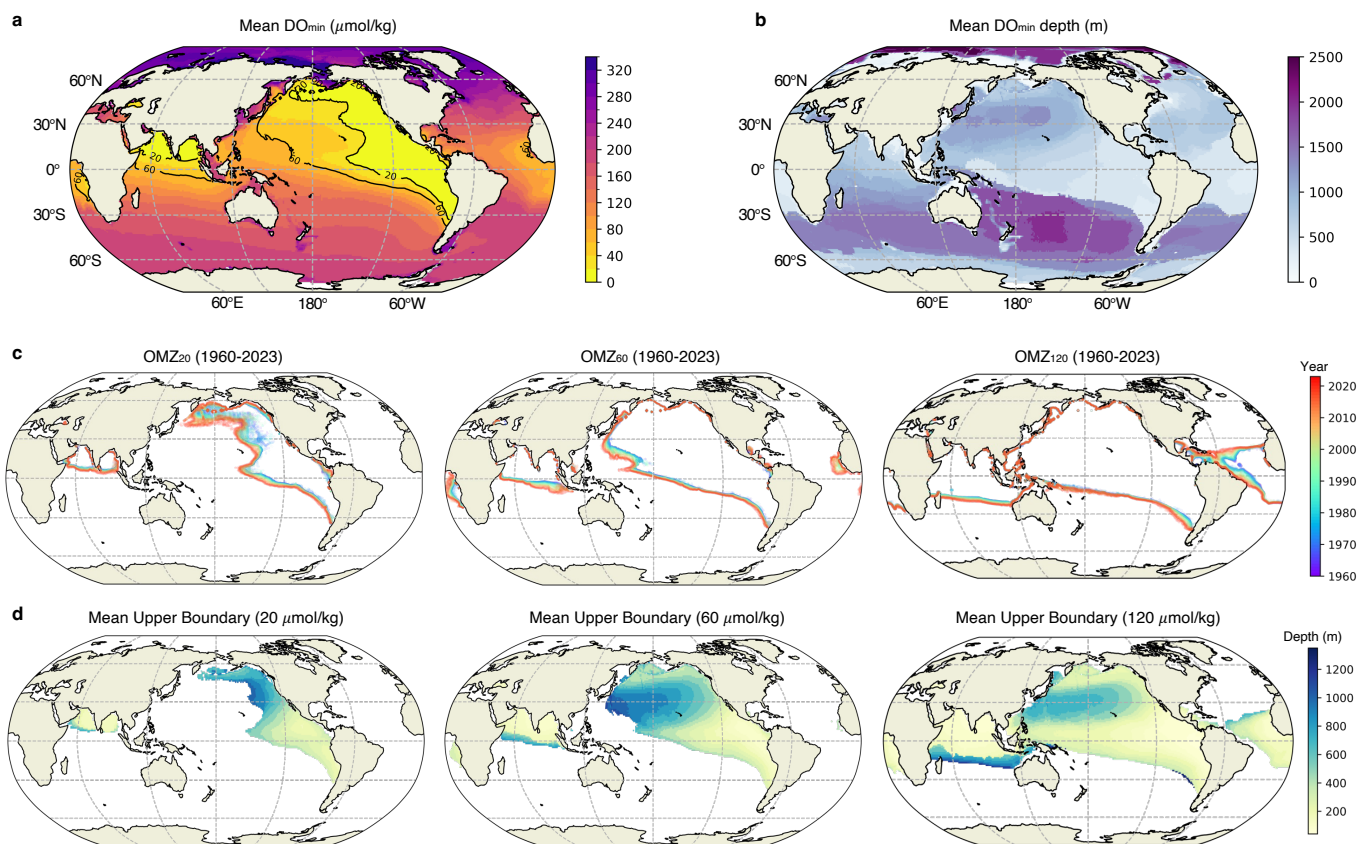

**Figure S8. Horizontal and vertical distribution of oxygen minimum zones (OMZs).** **a**, The average of the minimum dissolved oxygen concentration ( $DO_{min}$ ) within each profile. The map also shows the average ranges of areas where  $DO_{min}$  below  $20 \mu\text{mol/kg}$  (OMZ<sub>20</sub>, solid line) and  $DO_{min}$  below  $60 \mu\text{mol/kg}$  (OMZ<sub>60</sub>, dashed line). The distribution of OMZs exhibits a significant north-south asymmetry, concentrated in the North Indian Ocean, the North Pacific, and the Equatorial Pacific. **b**, The average of  $DO_{min}$  depth. **c**, Annual changes in the horizontal distribution of OMZ<sub>20</sub>, OMZ<sub>60</sub> and OMZ<sub>120</sub> from 1960 to 2023. OMZs present a trend of expansion in most regions. **d**, The mean depth of upper boundary for OMZ<sub>20</sub>, OMZ<sub>60</sub> and OMZ<sub>120</sub>. The upper boundary of OMZs in the Indian Ocean deepens from north to south, whereas in the Pacific Ocean, OMZs deepen westward and northward from the equatorial region, before becoming shallower again near  $50^\circ\text{N}$ .

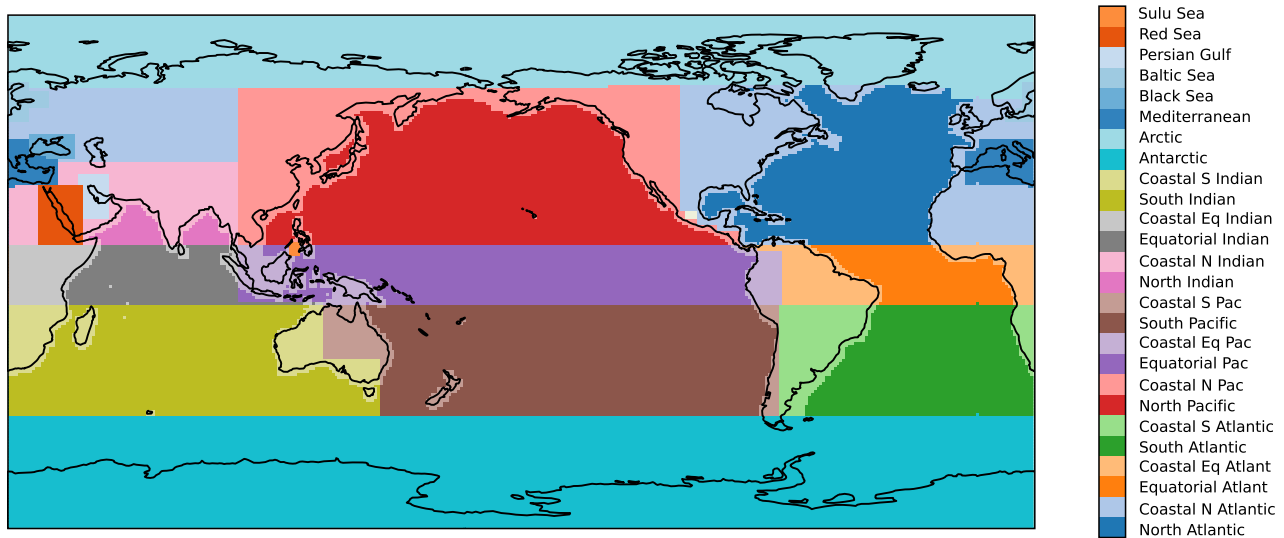

**Figure S9. Geographic boundaries of ocean basin definitions in WOD18.** World Ocean Database 2018 (WOD18) divides the world's oceans into 26 different zones based on hand-crafted rules. The zoning strategy for WOD mainly relies on ocean basins. Ocean basins are the basic geographic units of the global oceans, which indicate large bodies of water consisting of oceanic ridges, continental slopes and ocean basins. Ocean basin zoning aims to divide the global ocean into major regions according to different geographic, geological, and oceanographic features.

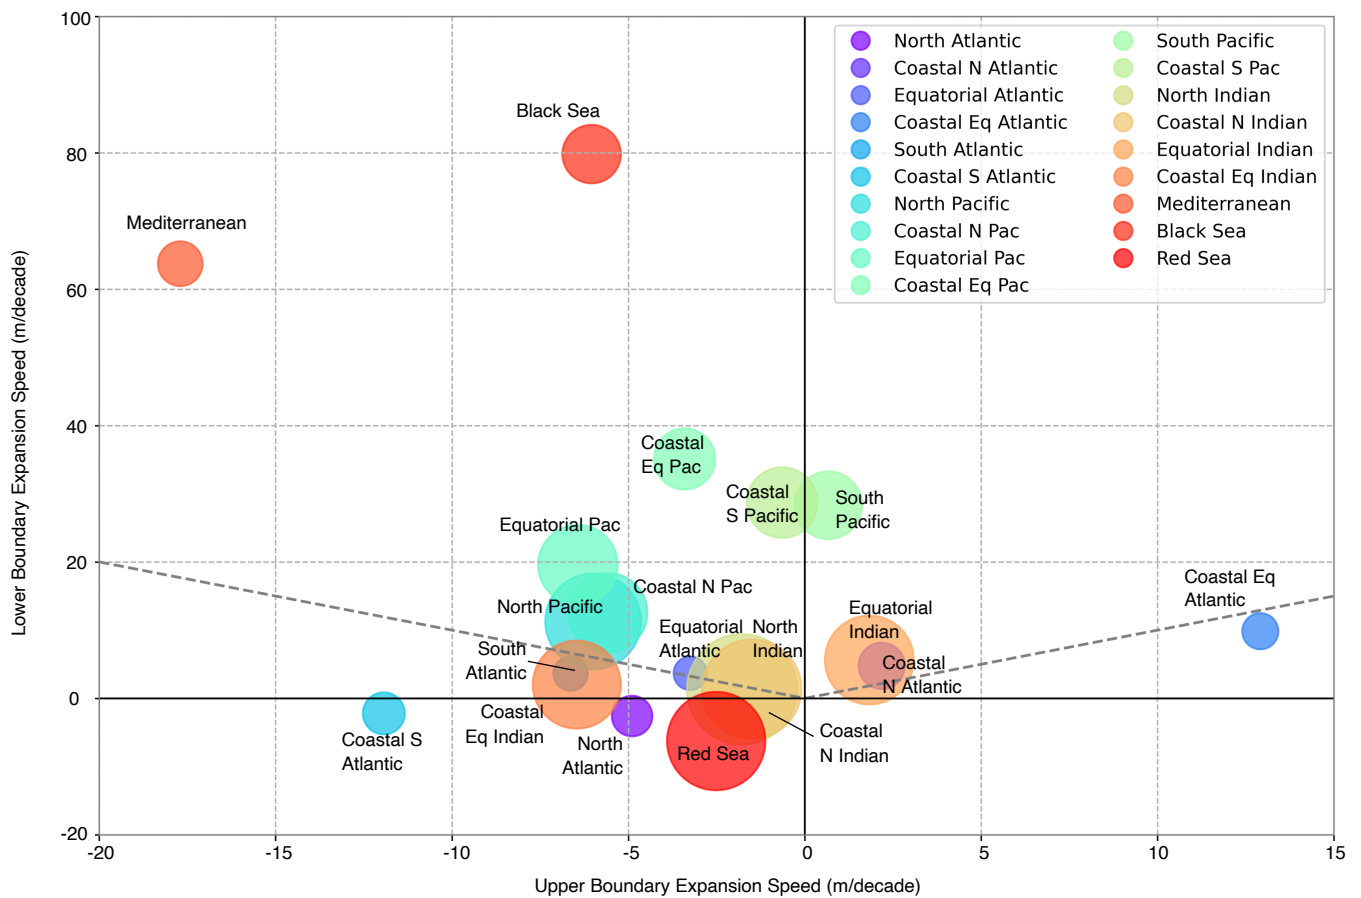

**Figure S10. Vertical expansion of OMZ<sub>60</sub>, i.e., hypoxic waters, in different ocean areas.** The horizontal and vertical axes represent the expansion rates of the upper and lower boundaries, respectively. The size of each point indicates the average thickness of the OMZ. A negative expansion speed of the boundary indicates an upward movement of the boundary, while a positive speed indicates a downward movement.

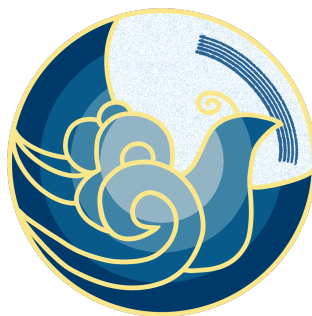

**Figure S11. The logo design of Jingwei.** The central theme depicts the mythical bird Jingwei blending with ocean waves, with Jingwei holding in its beak a 'digital branch' symbolizing data flow.



**Table S1. Detailed Information of data sources for global ocean observations.**

| Database                                                         | Time      | Institution                                                  | Source                                                              | Access Date |
|------------------------------------------------------------------|-----------|--------------------------------------------------------------|---------------------------------------------------------------------|-------------|
| World Ocean Database (WOD 2018)                                  | 1900-2023 | National Centers for Environmental Information               | <a href="https://www.ncei.noaa.gov/">https://www.ncei.noaa.gov/</a> | 2023-05     |
| CLIVAR and Carbon Hydrographic Database (CCHDO)                  | 1922-2023 | CLIVAR and Carbon Hydrographic Data Office                   | <a href="https://cchdo.ucsd.edu/">https://cchdo.ucsd.edu/</a>       | 2023-05     |
| Argo                                                             | 2001-2023 | Argo Global Data Assembly Center                             | <a href="https://argo.ucsd.edu/">https://argo.ucsd.edu/</a>         | 2023-05     |
| Global Ocean Data Analysis Project version2.2022 (GLODAPV2_2022) | 1972-2021 | NOAA's National Centers for Environmental Information (NCEI) | <a href="https://glodap.info/">https://glodap.info/</a>             | 2023-05     |
| Geotraces IDP                                                    | 2007-2018 | GEOTRACES International Data Assembly Centre (GDAC)          | <a href="https://www.geotraces.org">https://www.geotraces.org</a>   | 2023-10     |

**Table S2. Flag system of multiple databases.**

| FLAG                    | WOD             | CCHDO   | Argo | GLODAPV2_2022 | IDP 2021        |
|-------------------------|-----------------|---------|------|---------------|-----------------|
| 0: good quality         | 0               | 2       | 1    | 2             | 1               |
| 1: unknown quality      | N/A             | 0,1,5,8 | N/A  | N/A           | 0,5             |
| 2: questionable quality | 1               | 3,6,7   | 2,3  | 0             | 2,3,6,7,8,A,B,Q |
| 3: bad quality          | 2,3,4,5,6,7,8,9 | 4       | 4    | N/A           | 4               |
| 4: not sampled          | N/A             | 9       | 0,5  | 9             | 9               |

**Table S3. Detailed Information of Simulation Data from CMIP6.**

| Model                                                                                | Experiment | Institution                                         | Access Date |
|--------------------------------------------------------------------------------------|------------|-----------------------------------------------------|-------------|
| Community Earth System Model (CESM2) <sup>12</sup>                                   | omip1      | National Center for Atmospheric Research (NCAR)     | 2023-11     |
| Community Earth System Model (CESM2) <sup>12</sup>                                   | omip2      | National Center for Atmospheric Research (NCAR)     | 2023-11     |
| Geophysical Fluid Dynamics Laboratory - Earth System Model (GFDL-ESM4) <sup>13</sup> | historical | NOAA's Geophysical Fluid Dynamics Laboratory (GFDL) | 2023-11     |

**Table S5. Dividing the ocean from the surface to 5,500 meters into 33 depth layers.**

| Layer ID | Depth Level (m) | Level Boundary (m) |       |
|----------|-----------------|--------------------|-------|
| 1        | 0               | 0                  | 5     |
| 2        | 10              | 5                  | 15    |
| 3        | 20              | 15                 | 25    |
| 4        | 30              | 25                 | 40    |
| 5        | 50              | 40                 | 62.5  |
| 6        | 75              | 62.5               | 87.5  |
| 7        | 100             | 87.5               | 112.5 |
| 8        | 125             | 112.5              | 137.5 |
| 9        | 150             | 137.5              | 175   |
| 10       | 200             | 175                | 225   |
| 11       | 250             | 225                | 275   |
| 12       | 300             | 275                | 350   |
| 13       | 400             | 350                | 450   |
| 14       | 500             | 450                | 550   |
| 15       | 600             | 550                | 650   |
| 16       | 700             | 650                | 750   |
| 17       | 800             | 750                | 850   |
| 18       | 900             | 850                | 950   |
| 19       | 1000            | 950                | 1050  |
| 20       | 1100            | 1050               | 1150  |
| 21       | 1200            | 1150               | 1250  |
| 22       | 1300            | 1250               | 1350  |
| 23       | 1400            | 1350               | 1450  |
| 24       | 1500            | 1450               | 1625  |
| 25       | 1750            | 1625               | 1875  |
| 26       | 2000            | 1875               | 2250  |
| 27       | 2500            | 2250               | 2750  |
| 28       | 3000            | 2750               | 3250  |
| 29       | 3500            | 3250               | 3750  |
| 30       | 4000            | 3750               | 4250  |
| 31       | 4500            | 4250               | 4750  |
| 32       | 5000            | 4750               | 5250  |
| 33       | 5500            | 5250               | 5500  |

**Table S4. Predictor variables used to train Jingwei. Unitless quantities are denoted using '-'.** 

| Predictor Variable                  | Abbreviation | Unit               | Range (approx.) |
|-------------------------------------|--------------|--------------------|-----------------|
| Dissolved oxygen (simulated data)   | $D_{sim}$    | $\mu\text{mol/kg}$ | -10 to 405      |
| Dissolved oxygen (observation data) | $D_{obs}$    | $\mu\text{mol/kg}$ | 0 to 509        |
| DO observation at time $\tau$       | $X_\tau$     | $\mu\text{mol/kg}$ | 0 to 509        |
| Conservative temperature            | $T$          | $^{\circ}\text{C}$ | -3 to 34        |
| Absolute salinity                   | $S$          | PSU                | 0 to 41         |
| Seawater density                    | $\rho$       | $\text{kg/m}^3$    | 995 to 1055     |
| Seawater pressure                   | $P$          | dbar               | 0 to 5617       |
| Latitude                            | lat          | -                  | -90 to 90       |
| Longitude                           | lon          | -                  | -180 to 180     |
| Spheroidal coordinates              | $x, y, z$    | -                  | 0 to 1          |
| Depth                               | $L$          | m                  | 0 to 5500       |
| Year                                | $yr$         | year               | 1960 to 2023    |
| Bathymetry                          | $L_b$        | m                  | -8000 to 5500   |

**Table S6. Mean oxygen content based on Jingwei and comparison with the results from Nature'17<sup>1</sup>.** Based on the global ocean partition in Nature'17, we calculate the mean oxygen content globally and in different regions using the oxygen levels reconstructed by Jingwei. The results from both approaches are generally consistent and mutually validate that the existing estimates of the total ocean oxygen inventory are accurate. However, there are certain discrepancies in the understanding of specific regions. For instance, the total oxygen levels in the equatorial regions (Equatorial Atlantic, Equatorial Pacific, and Equatorial Indian Ocean) are underestimated, while those in the North Pacific, South Pacific, and South Indian Ocean are overestimated.

| Oxygen Content (Pmol)   | Nature'17 <sup>1</sup> | Jingwei (Ours) | Mean Diff. | Diff. Ratio |
|-------------------------|------------------------|----------------|------------|-------------|
| Arctic Ocean            | 4.73±0.16              | 5.42±0.04      | 0.69       | 14.68%      |
| North Atlantic          | 26.86±0.05             | 29.02±0.08     | 2.16       | 8.04%       |
| Eq. Atlantic            | 15.89±0.04             | 11.13±0.02     | -4.76      | -29.94%     |
| South Atlantic          | 22.39±0.05             | 24.44±0.04     | 2.05       | 9.16%       |
| North Pacific           | 24.48±0.10             | 29.77±0.06     | 5.29       | 21.60%      |
| Eq. Pacific             | 25.49±0.40             | 19.52±0.14     | -5.97      | -23.42%     |
| South Pacific           | 33.05±0.07             | 36.73±0.04     | 3.68       | 11.14%      |
| Eq. Indian Ocean        | 10.74±0.08             | 7.21±0.02      | -3.53      | -32.86%     |
| South Indian Ocean      | 26.13±0.06             | 29.95±0.02     | 3.82       | 14.61%      |
| Southern Ocean          | 37.62±0.09             | 37.06±0.07     | -0.56      | -1.48%      |
| Total                   | 227.38±1.10            | 232.13±0.20    | 4.75       | 2.09%       |
| Total (0-1200 m)        | 62.26±0.43             | 67.45±0.10     | 5.19       | 8.34%       |
| Total (1200 m – bottom) | 165.12±0.67            | 164.68±0.17    | -0.44      | -0.27%      |

**Table S7. Vertical expansion speed and thickness of hypoxic zones in various ocean regions around the world.**

| Regions             | OMZ <sub>20</sub> (O <sub>2</sub> ≤ 20μmol/kg) |                           |                           | OMZ <sub>60</sub> (O <sub>2</sub> ≤ 60μmol/kg) |                           |                           |
|---------------------|------------------------------------------------|---------------------------|---------------------------|------------------------------------------------|---------------------------|---------------------------|
|                     | Upper Boundary<br>(m/dec)                      | Lower Boundary<br>(m/dec) | Avg. OMZ<br>Thickness (m) | Upper Boundary<br>(m/dec)                      | Lower Boundary<br>(m/dec) | Avg. OMZ<br>Thickness (m) |
| North Atlantic      | -                                              | -                         | -                         | -4.899                                         | -2.581                    | 162.055                   |
| Coastal N Atlantic  | -                                              | -                         | -                         | 2.177                                          | 4.804                     | 211.229                   |
| Equatorial Atlantic | -                                              | -                         | -                         | -3.246                                         | 3.683                     | 110.422                   |
| Coastal Eq Atlantic | -                                              | -                         | -                         | 12.906                                         | 9.873                     | 128.881                   |
| South Atlantic      | -                                              | -                         | -                         | -6.645                                         | 3.666                     | 116.926                   |
| Coastal S Atlantic  | -                                              | -                         | -                         | -11.936                                        | -2.193                    | 173.867                   |
| North Pacific       | -3.256                                         | 9.566                     | 400.193                   | -6.003                                         | 11.291                    | 900.679                   |
| Coastal N Pac       | -5.362                                         | 5.729                     | 311.617                   | -5.586                                         | 12.600                    | 616.966                   |
| Equatorial Pac      | -8.046                                         | 7.995                     | 306.746                   | -6.433                                         | 19.591                    | 623.500                   |
| Coastal Eq Pac      | 10.778                                         | 9.841                     | 257.929                   | -3.415                                         | 35.110                    | 369.667                   |
| South Pacific       | -0.708                                         | 8.323                     | 213.959                   | 0.667                                          | 28.338                    | 449.600                   |
| Coastal S Pac       | 0.166                                          | 7.647                     | 233.206                   | -0.646                                         | 28.726                    | 489.382                   |
| North Indian        | -9.310                                         | 16.583                    | 680.934                   | -1.779                                         | 1.362                     | 1192.305                  |
| Coastal N Indian    | -11.883                                        | 15.266                    | 595.806                   | -1.507                                         | 1.396                     | 968.612                   |
| Equatorial Indian   | -3.941                                         | 14.691                    | 373.988                   | 1.829                                          | 5.628                     | 774.849                   |
| Coastal Eq Indian   | -8.518                                         | 1.173                     | 420.885                   | -6.467                                         | 2.025                     | 761.019                   |
| Mediterranean       | -                                              | -                         | -                         | -17.708                                        | 63.748                    | 197.267                   |
| Black Sea           | 1.094E-14                                      | 3.668E-15                 | 37.500                    | -6.044                                         | 79.838                    | 336.777                   |
| Red Sea             | -                                              | -                         | -                         | -2.517                                         | -6.245                    | 949.961                   |
